# Supplementary material
Source: PubMed Central journal article supplement (PMC3746195)
Supplement: emboj2013156s2.pdf [file emboj2013156s2.pdf]

### Supplementary Figure S6

**A**

| Symbol | Name                                                                 | FC     | P-value  |
|--------|----------------------------------------------------------------------|--------|----------|
| ACSL4  | acyl-CoA synthetase long-chain family member 4                       | -3.04  | 5.85E-14 |
| RRAS   | related RAS viral (r-ras) oncogene homolog                           | -2.18  | 4.47E-15 |
| LGR4   | leucine-rich repeat-containing G protein-coupled receptor 4          | -2.63  | 3.24E-10 |
| MET    | met proto-oncogene (hepatocyte growth factor receptor)               | -4.13  | 1.36E-21 |
| AXL    | AXL receptor tyrosine kinase FYVE, RhoGEF and PH domain containing 6 | -2.62  | 0.00E+00 |
| FGD6   | FYVE, RhoGEF and PH domain containing 6                              | -2.22  | 7.33E-23 |
| FOSL1  | FOS-like antigen 1                                                   | -4.55  | 5.91E-26 |
| SYT1   | synaptotagmin 1                                                      | -12.14 | 2.10E-10 |
| NAV3   | neuron navigator 3                                                   | -5.74  | 1.20E-04 |
| SLC4A7 | solute carrier family 4, sodium bicarbonate cotransporter, member 7  | -5.43  | 1.57E-06 |

**B**

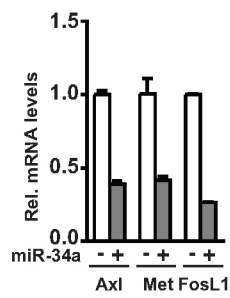

**C**

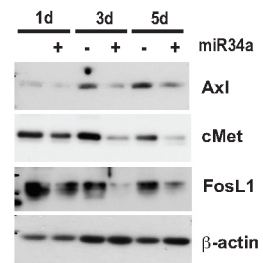

**D**

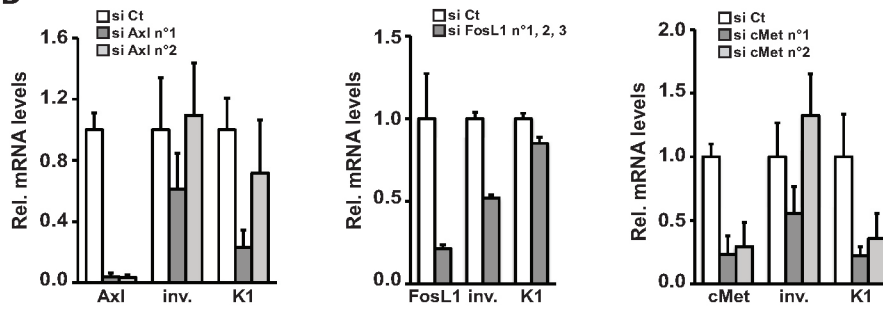

**Supplementary Figure S6. Identification of putative miR-34a target genes**

**with a possible role in differentiation.** (A) Among the 168 transcripts commonly down-regulated by elevated miR-34a levels and in differentiating HKCs (as analyzed in Figure 3F, right panel), 11 genes were predicted targets of miR-34a as determined by the presence of miR-34a recognition site(s) in their 3' UTR regions. For each of these genes, are shown their fold change expression in miR34a-overexpressing HKCs versus control as well as the corresponding P value. (B) HKCs transfected with precursor miR-34a (+) or scrambled control oligonucleotides (-) for 3 days were analyzed for expression of the indicated genes by qRT-PCR. (C) HKCs transfected as in the previous panel were analyzed at various times (days) by immuno-blotting for the indicated proteins. Given the equivalent molecular weight of the two proteins c-Met and Axl, their expression was assessed by a parallel gel/blot, while FosL1 protein levels were assessed on a different blot. All the gels were probed with an antibody against  $\beta$ -actin giving the same pattern of expression as the one shown. (D) HKCs were transfected for 3 days with multiple sets of siRNAs against Axl (si Axl), FosL1 (si FosL1; 3 different siRNAs pooled together), cMet (si cMet) in parallel with scrambled control (si Ct), followed by qRT-PCR analysis of the indicated genes.

## Supplementary Figure S7

A

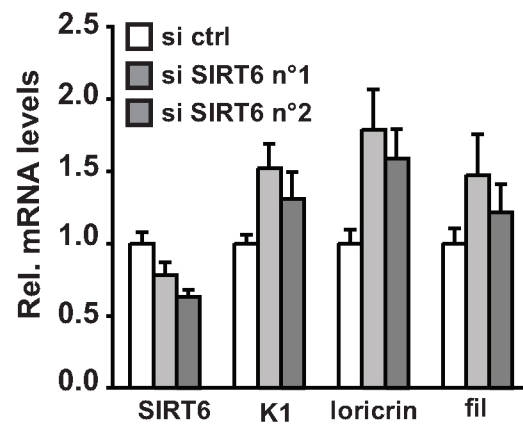

B

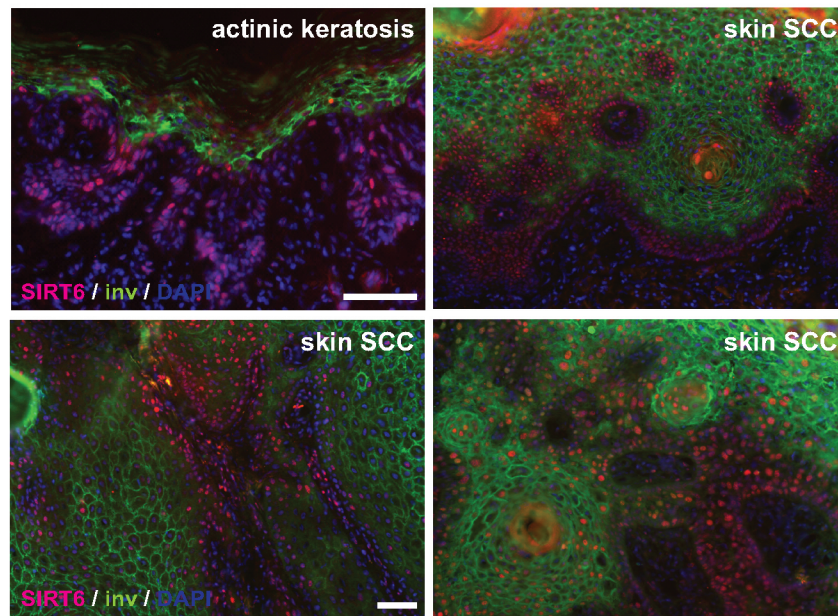

**Supplementary Figure S7. SIRT6 silencing promotes differentiation in SCC13 cells and HKCs while its expression is elevated in skin cancerous lesions.** (A) HKCs transfected for 3 days with siRNAs against SIRT6 (si SIRT6 n°1 and n°2) or scrambled control (si ctrl) were analyzed for expression of the indicated genes by qRT-PCR using 36β4 for normalization. (B) Double immunofluorescence analysis of SIRT6 (red) and involucrin (green) expression in a human actinic keratosis sample (same as S4 used for LCM analysis in Figure 1F) and skin SCCs, with DAPI for counterstaining. Bar = 200 μm.

**Supplementary Table 3: Primers used for real time RT-PCR reactions, methylation specific PCR and si-oligonucleotides**

| <b>Gene</b>         | <b>Forward primer (5'-3')</b>                 | <b>Reverse primer (5'-3')</b> |
|---------------------|-----------------------------------------------|-------------------------------|
| 5s GS/LNA           | CATGATCAGCTGGGCCAAGAAAGCC<br>TACAGCACCCGGTATT | TGGAAGCTAAGCAGGGTCCG          |
| MIR-34A-GS/LNA      | CATGATCAGCTGGGCCAAGAAACAA<br>CCAGCTA          | TGGCAGTGTCTTAGCT              |
| INTEGRIN $\alpha$ 6 | ATAAATTTTGCACCCGAGAAGGAA                      | GTTGGAAGGGCTGTTTGTCACTGT      |
| C-MET               | CACGAAGATCCCATTGAATGGCTTG                     | CCAGCCACATATGGTCAGCCTTGTC     |
| INVOLUCRIN          | AGGGAAGAGGGGATGCTAAA                          | GTGTGTGTTGCTGGGACATC          |
| PRE-MIR34A          | CCAGCTGTGAGTGTTTCTTTGG                        | GGCAGTATACTTGCTGATTGC         |
| PRI-MIR34A          | CCTCCAAGCCAGCTCAGTTG                          | TGACTTTGGTCCAATTCCTGTTG       |
| 36B4                | GCAATGTTGCCAGTGTCTGT                          | GCCTTGACCTTTTCAGCAAG          |
| B-ACTIN             | GCGTTGTTACAGGAAGTCCCTTGCC                     | TGCTATCACCTCCCCTGTGTGGA       |
| DNP63a              | ATTGCATCACTGTATCATTTTCT                       | TGCTCTGTGGGGACCTTTCA          |
| KERATIN 1           | GTTCCAGCGTGAGGTTTGT                           | TAAGGCTGGGACAAATCGAC          |
| NOTCH 1             | GAACCAATACAACCCTCTGC                          | AGCTCATCATCTGGGACAGG          |
| HERP1               | GCATATGATTCCGAGAGTGC                          | CGCAAGTGCTGAGATGAGAC          |
| P21WAF1/CIP1        | AGCAGAGGAAGACCATGTGGACCT                      | GAAGATGTAGAGCGGGCCTTTGAGG     |
| AXL                 | TGAACGAGAGAGCTTCCCAGCACC                      | TCCATGCCACTGGCGATGTCTG        |
| FOSL1               | TCCAGGCTACACAAAGCTAC                          | TTGTTCCGCTCGCGCCTTACTC        |
| KERATIN 10          | GAAAAGCATGGGCAACTCACA                         | TGTCGATCTGAAGCAGGATG          |
| SPRR3               | CCAGGCTACACAAAGCTAC                           | GCTTAATTCAGGGGCTTAC           |
| LORICRIN            | ATGATGCTACCCGAGGTTTG                          | ACTGGGGTTGGGAGGTAGTT          |
| FILAGGRIN           | TGGACACCCGGGGTCAAGCA                          | TGCCACGGGAGGCATCAGA           |
| P16INK4A            | CCAACGCACCGAATAGTTAC                          | ATTCCAATCCCCTGCAAACCT         |
| P15INK4B            | GCGGGGACTAGTGGAGAAGGTGC                       | GTCGGGTGAGAGTGGCAGGGTC        |
| CDK4                | TCCTCTGTTTGGCTTTGCCA                          | GACTTCCTAGGCCCTGTAAT          |
| PAI1                | TGAAGATCGAGGTGAACGAG                          | GAAAAGGACTGTTCTGTGG           |
| GRO1                | ACTCAAGAATGGGCGGAAAGCTTG                      | AGCGATGCTCAAACACATTAGGCAC     |
| DCR2                | TTGCCTTCTTGCTGCTATG                           | TACTGACCTTGACCACCTCT          |
| KI67                | CTGCTTGTGGGAAGGGGTA                           | AGCCGTACAGGCTCATCAAT          |
| SIRT6               | TACGCGGACAAGGGCAAG                            | ACTTGGGGGCCAGACCTCGC          |
| FGF21               | AAGACATCCAGGTTTCTGTG                          | TATCCGTCTCAAGAAGCAG           |
| P53                 | AGGCCTTGGAACTCAAGGAT                          | CTGAGTCAGGCCCTTCTGTG          |
| BAX                 | TAACATGGAGCTGCAGAGGA                          | CAGTTGAAGTTGCCGTGAG           |
| BIM                 | TGCAGACATTTTGCTTGTCAA                         | GAACCGCTGGCTGCATAATAAT        |
| UNMET. MIR34A       | IIGTTTTGGGTAGGTGTGTTTT                        | AATCCTCATCCCCTTCACCACCA       |
| MET. MIR34A         | GGTTTGGGTAGGCGGTTTC                           | TCCTCATCCCCTTCACCGCCG         |

**Si RNA targeted sequence**

|              |                     |
|--------------|---------------------|
| si Axl n°1   | GGAACUGCAUGCUGAAUGA |
| si Axl n°2   | CAGCGAGAUUUUUGACUAU |
| si FosL1 n°1 | CGAAGGCCUUGUGAACAGA |
| si FosL1 n°2 | GGAAGGAACUGACCGACUU |
| si FosL1 n°3 | CCAUCUGCAAAAUCCCGGA |
| si cMet n°1  | GCUACUUAUGUGAACGUAA |
| si cMet n°2  | GCACUAGCAAAGUCCGAGA |

si SIRT6 n°1  
si SIRT6 n°2

AAGCUGGAGCCCAAGGAGGAAUCUC  
AAGAAUGUGCCAAGUGUAAGACGUG

---
