# Supplementary material
Source: PubMed Central journal article supplement (PMC3746195)

Figure 2H

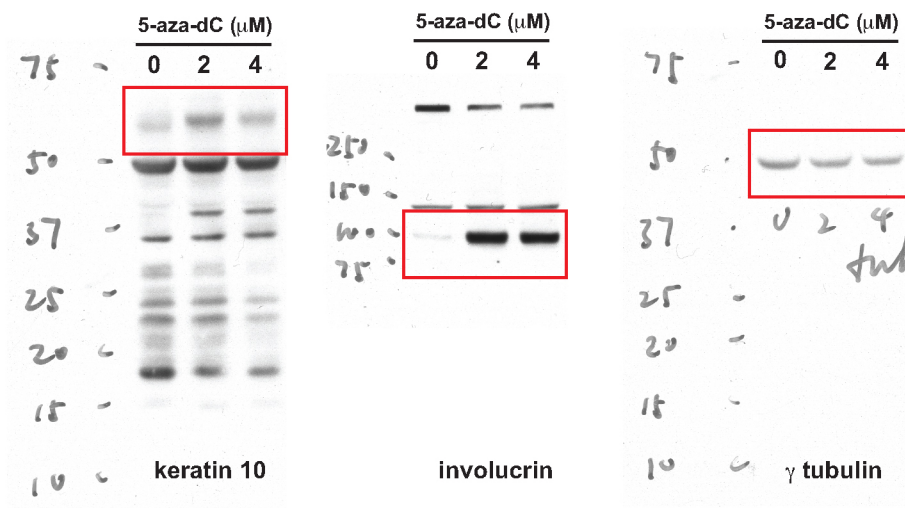

Supplement: emboj2013156df2.pdf [file emboj2013156df2.pdf]

Figure 3E

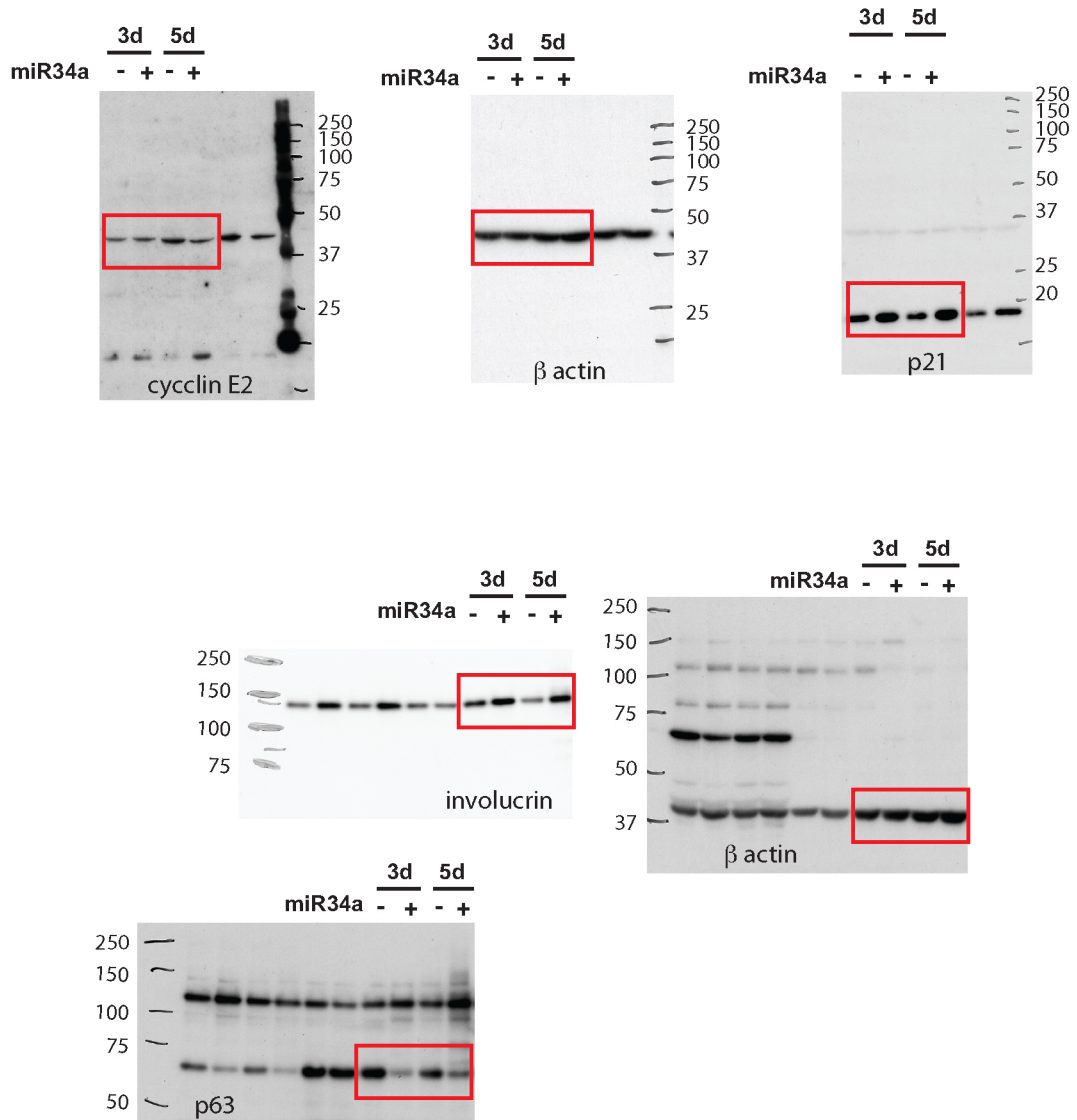

Supplement: emboj2013156df3.pdf [file emboj2013156df3.pdf]

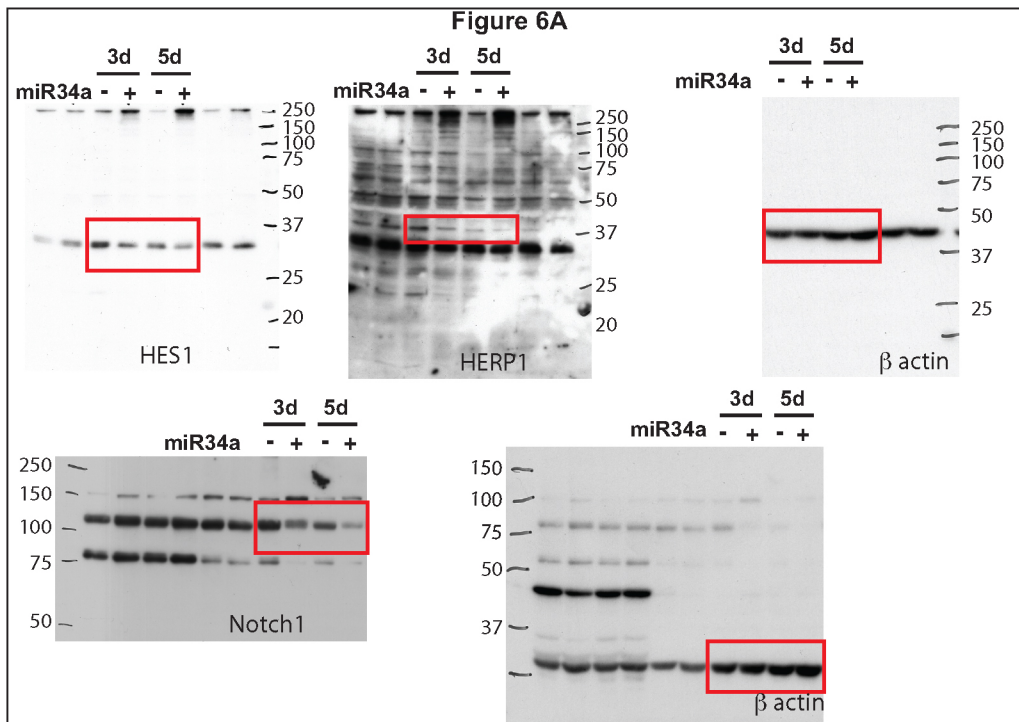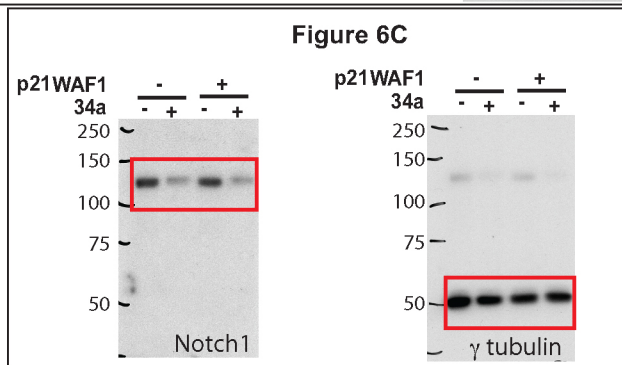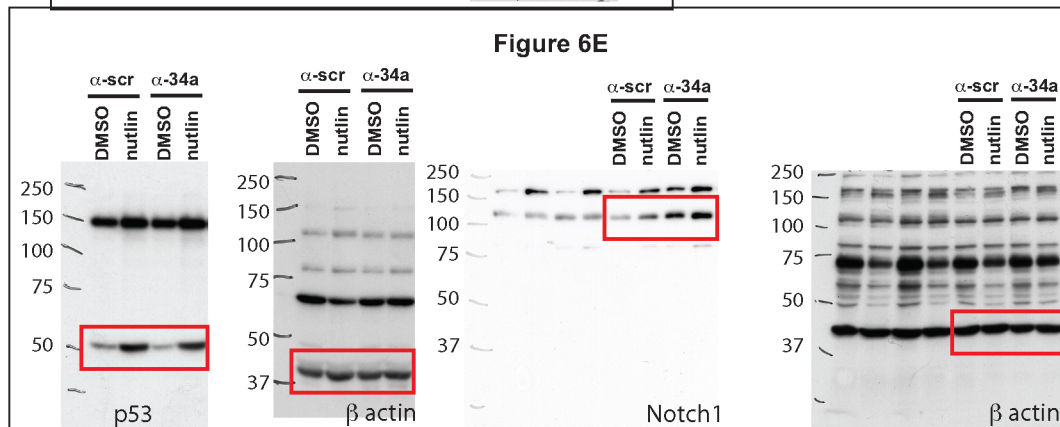

Supplement: emboj2013156df6.pdf [file emboj2013156df6.pdf]

**Figure 7A**

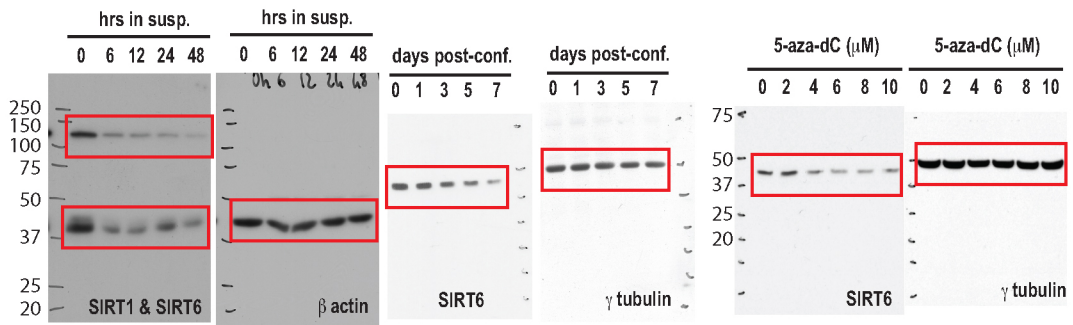

**Figure 7B**

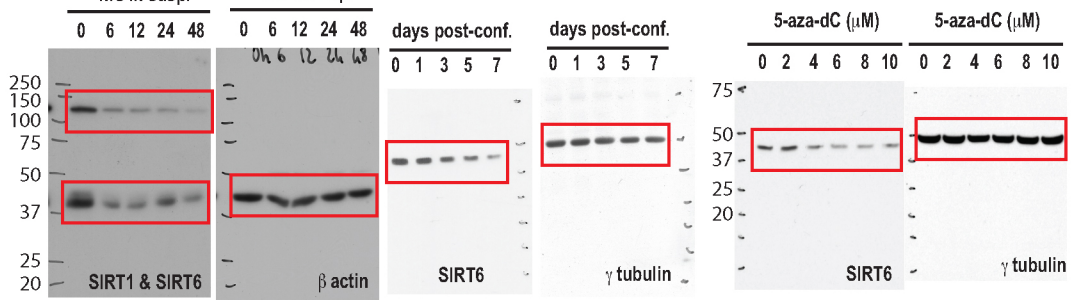

**Figure 7C**

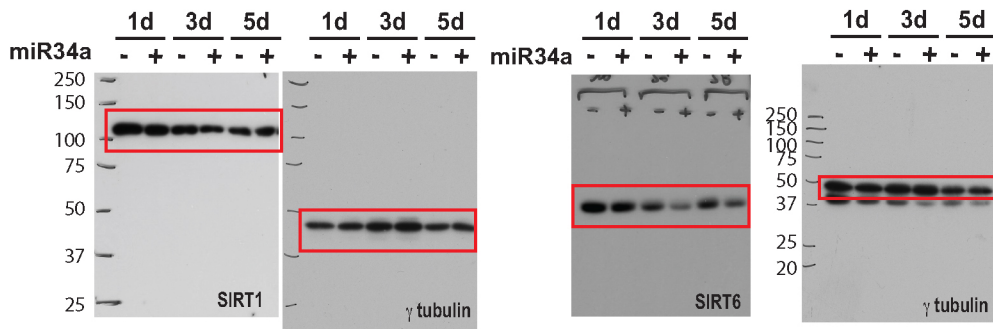

**Figure 7E**

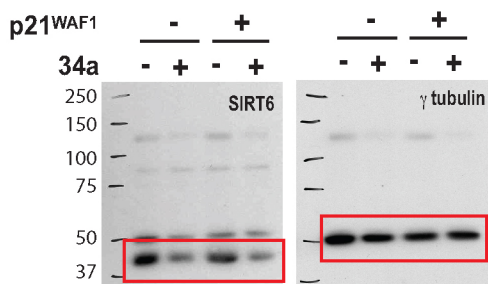

Supplement: emboj2013156df7.pdf [file emboj2013156df7.pdf]

Figure 8E

strain 1

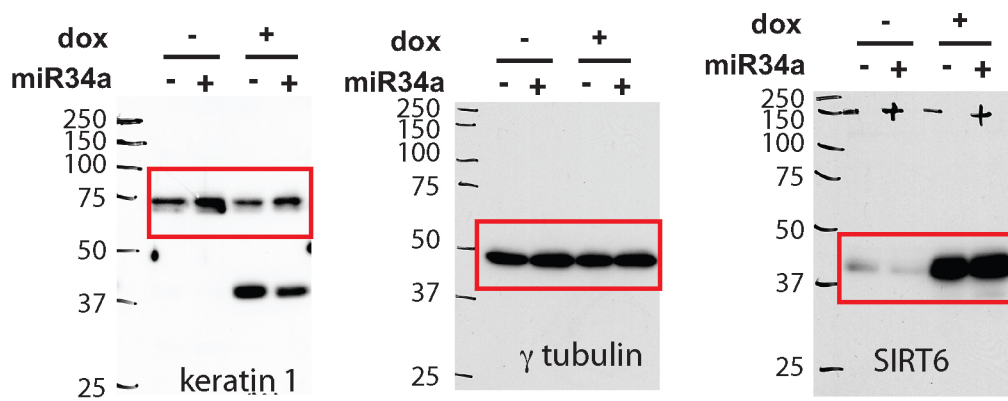

strain 2

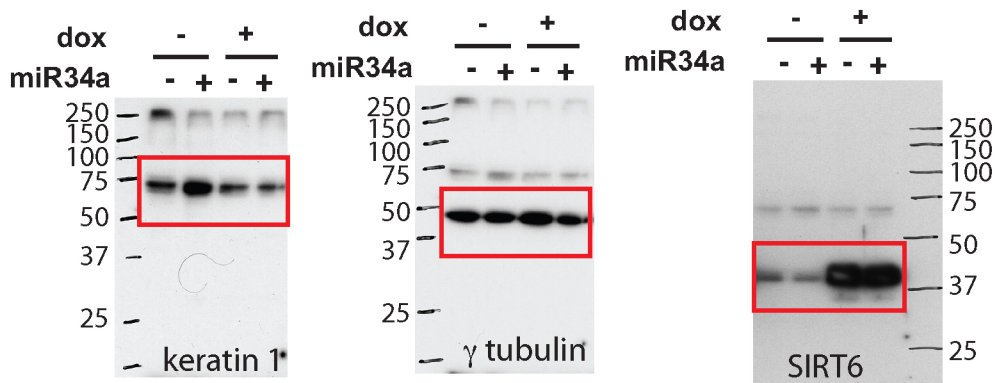

Supplement: emboj2013156df8.pdf [file emboj2013156df8.pdf]
